# Supplementary material for: An insight into gill microbiome of Eastern Mediterranean wild fish by applying next generation sequencing
Source: Frontiers journal article supplement (doi:10.3389/fmars.2022.1008103), 2022-09-29
Supplement: Table_1.xlsx [file Table_1.xlsx]

## Sheet: Table 1
TABLE S1 Potentially pathogenic bacterial species' prevalence in the gills of fish sampled. The data presented combines ASVs identified as being associated with a pathogenic species to a high level of certainty. The percentage accounts for the number of samples out of the total (per species) that this potential pathogen was found in. Marine Pathogenicity marks where the literature indicated patho…
Bacteria	ACM	LLF	BSSB	Marine Pathogenicity	Marine Pathology	Clinical Relevance	Human Pathology
Shewanella baltica	0.95	0.458	0.92	Unknown		Yes	Food spoilage (Zhu et al., 2015)
Photobacterium damselae	0.725	0.375	0.84	Yes	Hemorrhages, ulcerative lesions, septicemia (Terceti et al., 2017, Rivas et al., 2013, Pham et al., 2020)	Opportunistic	Necrotizing fasciitis (Rivas et al., 2013, Matanza & Osorio, 2020)
Kytococcus sedentarius	0.475	0.125	0.36	Unknown		Pathobiont	Hemorrhagic pneumonia (Levenga et al., 2004)
Cutibacterium acnes	0.225	0.583	-	Unknown		Pathobiont	Acne vulgaris (Castillo et al., 2019)
Rothia dentocariosa	0.175	0.292	-	Unknown		Pathobiont	Endophthalmitis (MacKinnon et al., 2001)
Vagococcus carniphilus	0.1	-	0.32	Yes	Liver, myocardium, spleen, kidney necrosis (Chang et al., 2018)	Unknown
Lawsonella clevelandensis	0.125	0.167	-	Unknown		Yes	Breast abscess (Manaezes et al., 2018)
Streptococcus sanguinis	0.175	0.042	-	Unknown		Pathobiont	Endocarditis (Zhu et al., 2018)
Tenacibaculum maritimum	0.175	-	-	Yes	Gill abrasion (Powell et al., 2005)	Unknown
Acinetobacter lwoffii	0.125	0.042	-	Yes	Tissue lesions (Cao et al., 2018)	Opportunistic	Acute gastroenteritis (Regalado et al., 2009)
Cardiobacterium hominis	0.075	0.083	-	Unknown		Rarely	Endocarditis (Malani et al., 2006)
Flavobacterium johnsoniae	0.15	-	-	Yes	Skin erosion (Li et al., 2015)	Unknown
Granulicatella elegans	0.025	0.125	-	Unknown		Yes	Bacteremia, endocarditis (Alberti et al., 2016)
Staphylococcus epidermidis	0.025	0.125	-	Opportunistic	Fin, gills haemorrhages (Kubilay & Uluköy, 2004)	Pathobiont	Bloodstream infections (Otto, 2009)
Corynebacterium lipophiloflavum	0.1	0.042	-	Unknown		Yes	Bacterial vaginosis (Funke et al., 1997)
Rothia mucilaginosa	0.1	0.042	-	Unknown		Pathobiont	Pneumonia (Maraki, 2015)
Vibrio nereis	0.05	-	0.08	Yes	Vibriosis (Mondal et al., 2016)	Unknown
Vibrio scophthalmi	0.05	-	0.08	Opportunistic	Liver, intestine hemorrhage (Qiao et al., 2012, Zhang et al., 2020c)	Unknown
Actinomyces odontolyticus	0.025	0.083	-	Unknown		Rarely	Lung abscess (Takiguchi et al., 2003)
Lautropia mirabilis	0.025	0.083	-	Unknown		Pathobiont	Periodontitis (Colombo et al., 2012)
Kingella oralis	0.05	0.042	-	Unknown		Pathobiont	Periodontitis (Chen, 1996)
Abiotrophia defectiva	0.025	0.042	-	Unknown		Yes	Endocarditis (Alberti et al., 2016, Kiernan et al., 2008)
Lactobacillus iners	0.025	0.042	-	Unknown		Pathobiont	Vaginal dysbiosis (Petrova et al., 2017)
Shewanella putrefaciens	0.025	0.042	-	Pathobiont	Shewanellosis (Esteve et al., 2017, Paździor, 2016)	Rarely	Otitis, hepatobiliary infection (Vignier et al., 2013)
Sphingomonas koreensis	0.025	0.042	-	Unknown		Rarely	Meningitis (Marbjerg et al., 2015)
Staphylococcus capitis	0.025	0.042	-	Yes	Skin necrosis (Marcel et al., 2013)	Yes	Prosthetic joint infections (Tevell et al., 2017)
Acinetobacter radioresistens	0.05	-	-	Unknown		Yes	Bacteremia and pneumonia (Wang et al., 2019)
Janibacter hoylei	0.05	-	-	Unknown		Rarely	Bacteremia (Lim et al., 2017)
Streptococcus anginosus	0.05	-	-	Unknown		Yes	Brain, liver abscesses (Brassil et al., 2020)
Alkanindiges hongkongensis	-	0.042	-	Unknown		Rarely	Parotid abscess (Woo et al., 2005)
Campylobacter gracilis	-	0.042	-	Unknown		Yes	Periradicular lesions (Siqueira & Rôças, 2003)
Cutibacterium granulosum	-	0.042	-	Unknown		Pathobiont	Periprosthetic joint infection (Kusejko et al., 2021)
Fusobacterium nucleatum	-	0.042	-	Unknown		Pathobiont	Periodontitis (Brennan & Garrett, 2019), associated with oral cancer (Brennan & Garrett, 2019, Zhang et al., 2020b)
Stenotrophomonas maltophilia	-	0.042	-	Opportunistic	Visceral hemorrhage, fin/tail rot (Abraham et al., 2016)	Opportunistic	Lung cell lysis in CF patients (Brooke et al., 2017)
Streptococcus mutans	-	0.042	-	Unknown		Opportunistic	Dental caries (Krzyściak et al., 2014)
Acinetobacter schindleri	0.025	-	-	Yes	Red eye disease (Reddy & Mastan, 2013)	Rarely	Bacteremia (Montaña et al., 2018)
Aeromonas hydrophila	0.025	-	-	Yes	Gastroenteritis, septicemia, and necrotizing fasciitis (Rasmussen-ivey et al., 2016)	Yes	Diarrhea (Khajanchi et al., 2010)
Aggregatibacter segnis	0.025	-	-	Unknown		Pathobiont	Associated with oral cancer (Zhang et al., 2020b)
Corynebacterium durum	0.025	-	-	Unknown		Yes	Blood cultures, gingiva, abscesses (Bernard, 2005)
Psychrobacter arenosus	0.025	-	-	Unknown		Rarely	Bacteremia (Caspar et al., 2013)
Vibrio alginolyticus	0.025	-	-	Yes	White spot disease (Selvin & Lipton, 2003, Xie et al., 2005)	Yes	Wound infection (Reilly et al., 2011)
